# Supplementary material for: Inhibition of eIF6 Activity Reduces Hepatocellular Carcinoma Growth: An In Vivo and In Vitro Study
Source: MDPI journal article supplement (doi:10.3390/ijms23147720), 2022-07-13
Supplement: s1 [file s1]

## Supplementary Information

This file contains Figure S1 and Figure S2.

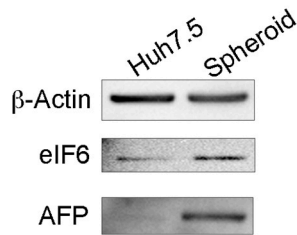

**Figure S1. eIF6 and AFP protein levels increase in HCC spheroids.**

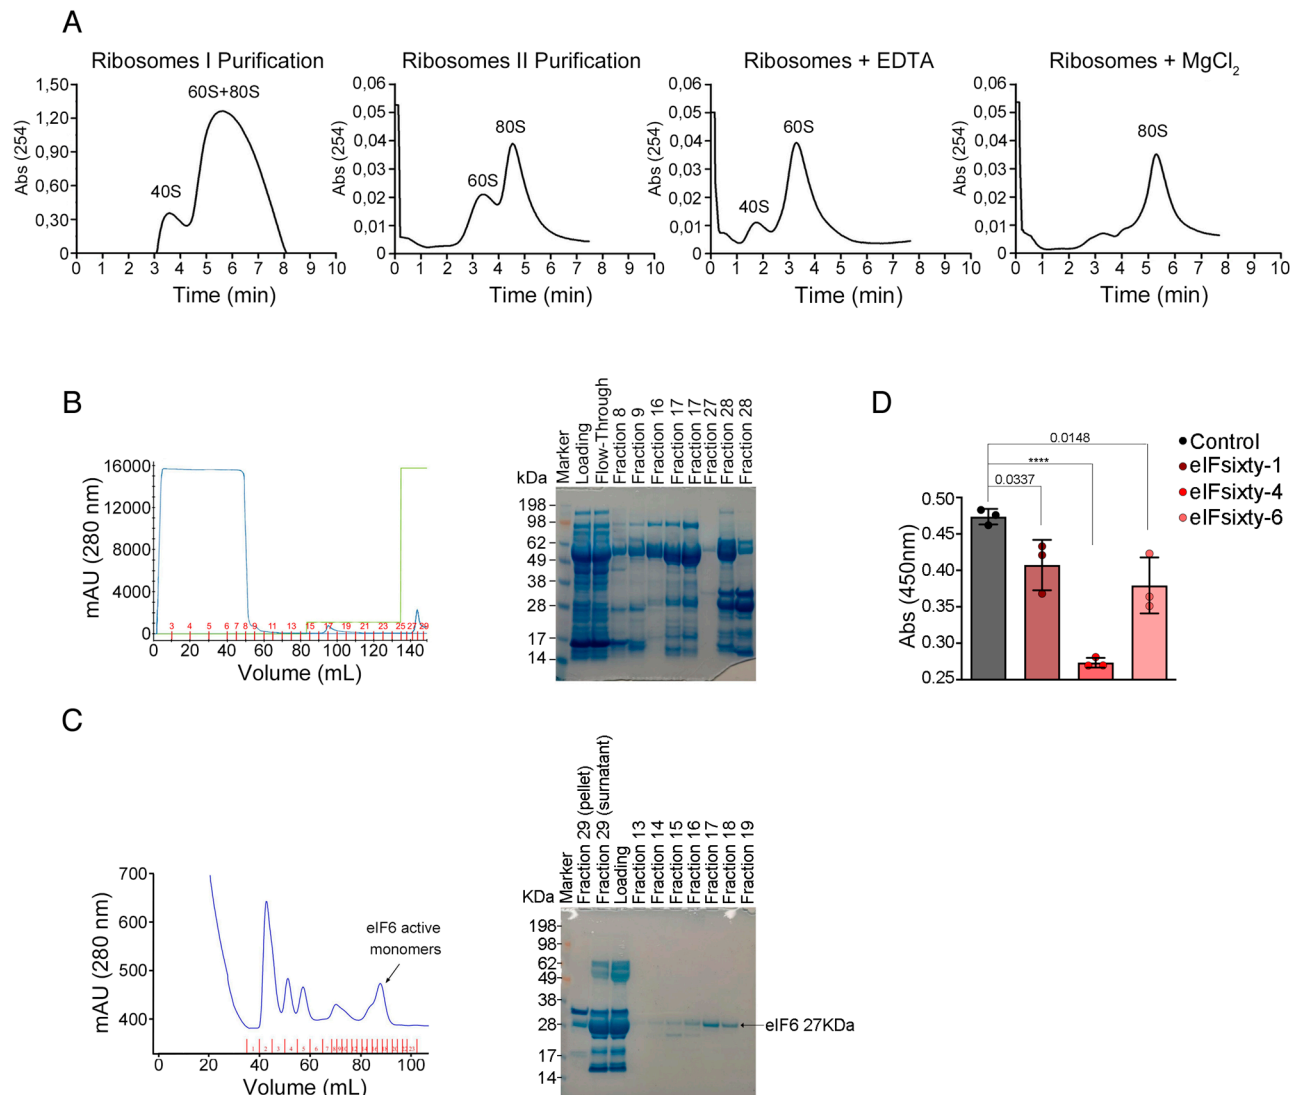

**Figure S2. Ribosomes and recombinant eIF6 protein purification. Assay on pure 60S *Artemia* ribosomes (A)** Ribosomes purifications from *Artemia Salina* eggs are represented in the first and the second profile. 80S monosomes were dissociated into 40S and 60S ribosome subunits after EDTA treatment. The addition of  $MgCl_2$  allowed joining of 40S and 60S ribosomes. **(B)** His Trap affinity chromatography purification of eIF6 recombinant protein (left) and Blue Coomassie staining of collected fractions (right). **(C)** Purification of eIF6 active monomers: eluted proteins (from B), corresponding to the 28<sup>th</sup> fraction, were loaded in a gel filtration column: eIF6 monomers (17<sup>th</sup> and 18<sup>th</sup> fractions) were eluted, loaded in a 10% polyacrylamide gel and stained with Blue Coomassie. **(D)** iRIA: addition of eIFsixty-i compounds to the reactions impairs eIF6-60S binding. The following concentration are used: 1,4  $\mu$ M for eIFsixty-1; 5  $\mu$ M for eIFsixty-4 and 1  $\mu$ M for eIFsixty-6. One representative of three independent experiments is shown. Two-tailed *t* test, \*\*\*\* *p* value  $\leq 0.0001$ .
